# Supplementary material
Source: PubMed Central journal article supplement (PMC3808641)
Supplement: 1312649110_pnas.201312649SI.pdf [file 1312649110_pnas.201312649SI.pdf]

# Supporting Information

Furukawa et al. 10.1073/pnas.1312649110

## SI Materials and Methods

We amplified the nucleotide sequences corresponding to residues 74–219 of Mincle (macrophage inducible C-type lectin) and residues 61–215 of MCL (macrophage C-type lectin) using the following primer sets: 5'-GAGATATACATATGGGTTTCAGTCAAGAAATT-3' and 5'-AGAGGATTCTTAAAGAGATTTTCCTTTGT-T-3' (for Mincle; restriction sites are underlined) and 5'-GAGATATACATATGCATGCAAAGCTCAAAT-3' and 5'-AGAGGATT-CGTTCAATGTTGTTCCAGGTATTTT-3' (for MCL; restriction sites are underlined), and human PBMC cDNA as a template. PCR-amplified Mincle and MCL products were digested with BamHI/NdeI and ligated into BamHI/NdeI-digested pET22 (Novagen) to produce pET22-Mincle and pET22-MCL, respectively.

The construction of the plasmid to express the I99K mutant is described below. Initially, two fragments, the T7 promoter to the mutant point and the mutant point to the T7 terminator, were amplified by the primer sets 5'-TAATACGACTCACTATAG-3' and 5'-GGTGTCTAGTAAAAAGAAGTAGCAG-3', and 5'-AAATCCTGGGCGTTAAGTTTAAAGA-3' and 5'-CCGCTGAGCAATAACTAGC-3', using pET22-Mincle, respectively (mutation site is underlined). The entire mutated Mincle fragment was amplified by PCR from the fragments of the T7 promoter to the mutant point and the mutant point to the T7 terminator with the primer sets 5'-TAATACGACTCACTATAG-3' and 5'-CCGCTGAGCAATAACTAGC-3'. The amplified entire mutated Mincle PCR product was digested with BamHI/NdeI and ligated into BamHI/NdeI-digested pET22 to produce pET22-hMincle I99K.

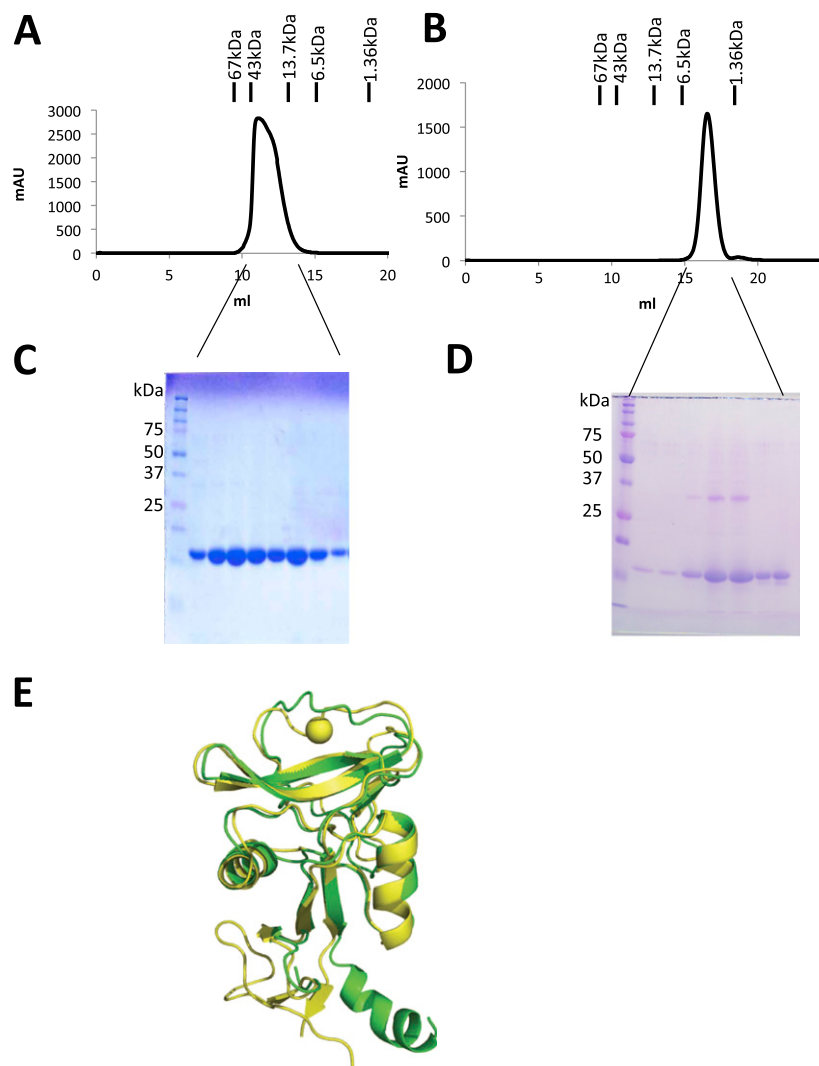

**Fig. S1.** Elution profiles of MCL (A) and Mincle (B) from size-exclusion chromatography using a Superdex 75 10/300 GL column (GE Healthcare) are shown. The eluted fractions of MCL (C) and Mincle (D) were separated and stained by Coomassie brilliant blue. (E) The superimposition of crystal (yellow) and solution (PDB ID code 2LS8) (green) structures of MCL is shown. Spheres indicate Ca<sup>2+</sup> ions. AU, arbitrary unit.

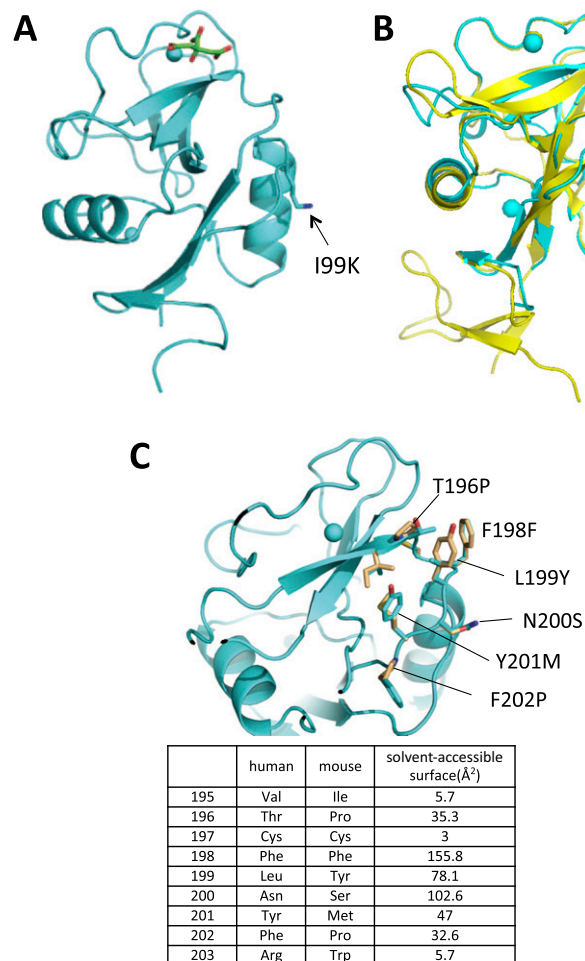

**Fig. 52.** Crystal structures of MCL and Mincle. (A) A stick model of lysine mutated from isoleucine at residue 99 of Mincle is shown in a cartoon model of Mincle. (B) The superimposed structures of MCL (yellow) and Mincle (cyan) are shown. Spheres indicate  $\text{Ca}^{2+}$  ions. (C) Amino acid substitutions on the hydrophobic patch between human and mouse Mincle are mapped onto the crystal structure together with their solvent-accessible areas. The area sizes of solvent-accessible surface of each residue in the putative hydrophobic loops are shown in the table. The sizes were calculated by the AREAIMOL program in CCP4 ([www.ccp4.ac.uk](http://www.ccp4.ac.uk)).



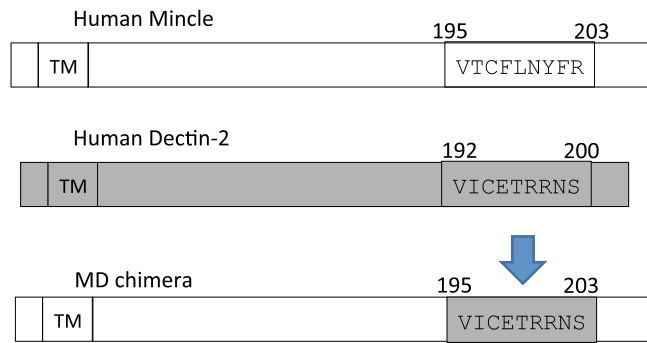

**Fig. S4.** Schematic representation of the Mincle–Dectin-2 (MD) chimera. The hydrophobic loop in Mincle was mutated to the corresponding amino acid residues in Dectin-2. TM, transmembrane domain.

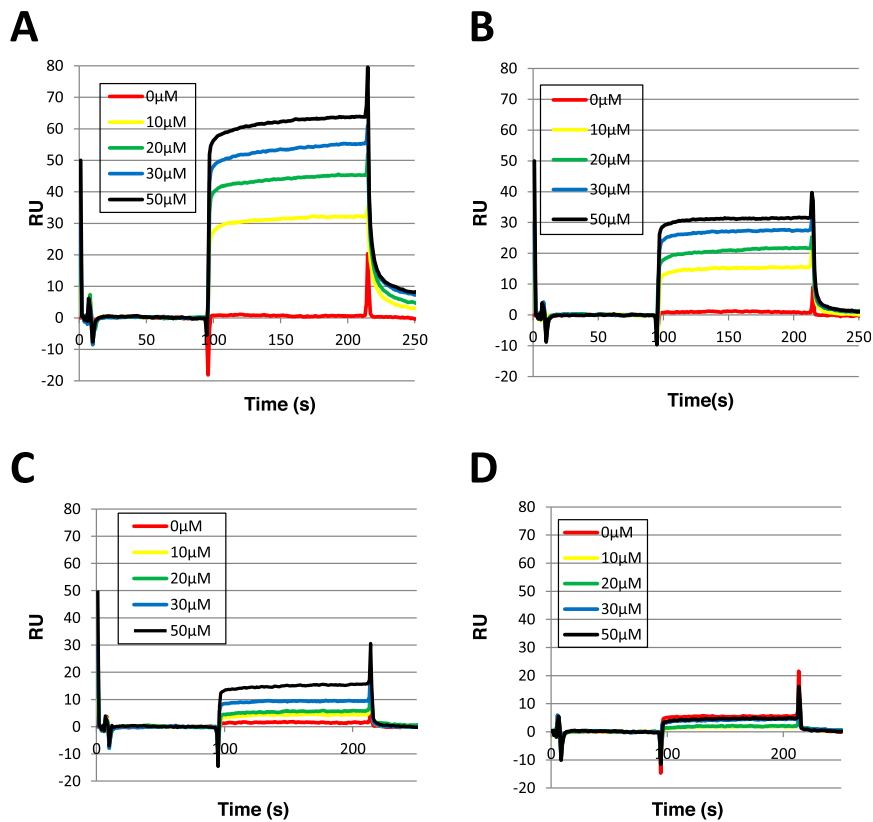

**Fig. S5.** Surface plasmon resonance (SPR) analysis of Mincle and several lengths of acyl chains with trehalose was performed. Sensorgrams for binding to C12 (A), C10 (B), C8 (C), and trehalose (D) in Fig. 4G are shown. RU, response units.
